# Supplementary material
Source: ML conference proceedings conference paper supplement (https://proceedings.neurips.cc/paper_files/paper/2018/hash/c90070e1f03e982448983975a0f52d57-Abstract.html)
Supplement: Supplementary file [file c90070e1f03e982448983975a0f52d57-Supplemental.zip]

---

# Searching for Efficient Multi-Scale Architectures for Dense Image Prediction

## – Supplementary Material –

---

**Liang-Chieh Chen**   **Maxwell D. Collins**   **Yukun Zhu**   **George Papandreou**  
**Barret Zoph**   **Florian Schroff**   **Hartwig Adam**   **Jonathon Shlens**  
Google Inc.

In this supplementary material, we provide more dataset details, and visualization results of our proposed model on each dataset.

## 1 Details of dense prediction datasets

### 1.1 Cityscapes

The Cityscapes [2] contains high quality pixel-level annotations of 5000 images with size  $1024 \times 2048$  (2975, 500, and 1525 for the training, validation, and test sets respectively) and about 20000 coarsely annotated training images. Following the evaluation protocol [2], 19 semantic labels are used for evaluation without considering the void label.

### 1.2 PASCAL-Person-Part

The PASCAL-Person-Part dataset [1] provides detailed part annotations for every person, including Head, Torso, Upper/Lower Arms and Upper/Lower Legs, resulting in six person part classes and one background class. There are 1716 images for training and 1817 images for validation.

### 1.3 PASCAL VOC 2012 segmentation

The PASCAL VOC 2012 benchmark [3] involves segmenting 20 foreground object classes and one background class. The original dataset contains 1464 (*train*), 1449 (*val*), and 1456 (*test*) pixel-level labeled images for training, validation, and testing, respectively. The dataset is augmented by the extra annotations provided by [4], resulting in 10582 (*trainaug*) training images.

## 2 Visualization of model predictions

### 2.1 Cityscapes

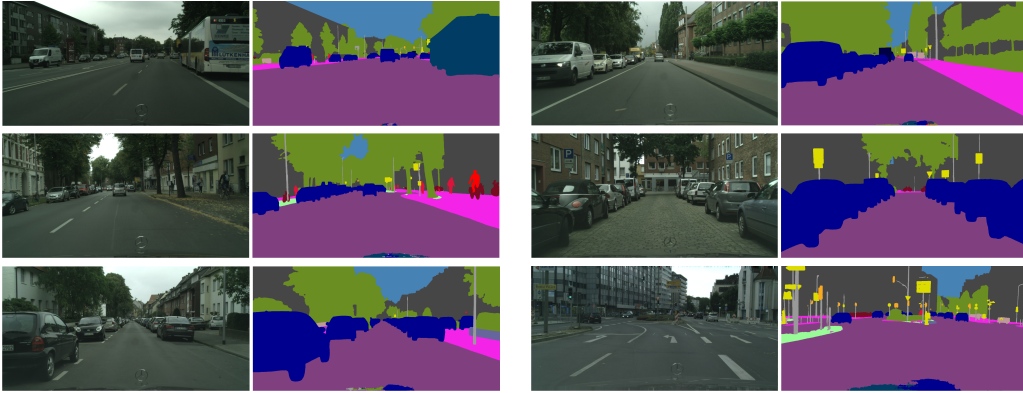

Figure 1: Visualization of predictions on the Cityscapes *validation* set.

### 2.2 PASCAL-Person-Part

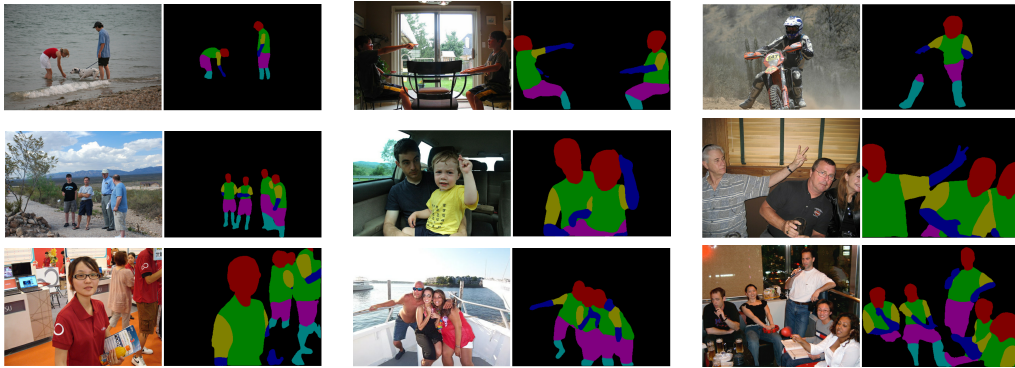

Figure 2: Visualization of predictions on PASCAL-Person-Part *validation* set.

### 2.3 PASCAL VOC 2012

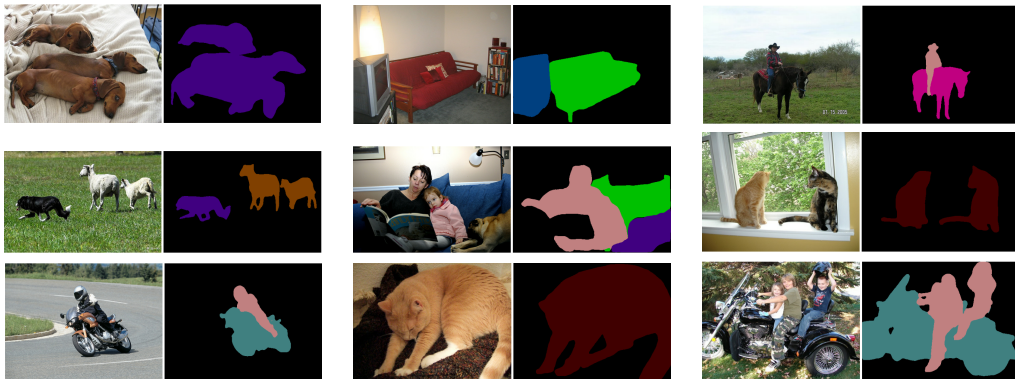

Figure 3: Visualization of predictions on PASCAL VOC 2012 *validation* set.

## References

- [1] X. Chen, R. Mottaghi, X. Liu, S. Fidler, R. Urtasun, and A. Yuille. Detect what you can: Detecting and representing objects using holistic models and body parts. In *CVPR*, 2014.
- [2] M. Cordts, M. Omran, S. Ramos, T. Rehfeld, M. Enzweiler, R. Benenson, U. Franke, S. Roth, and B. Schiele. The cityscapes dataset for semantic urban scene understanding. In *CVPR*, 2016.
- [3] M. Everingham, S. M. A. Eslami, L. V. Gool, C. K. I. Williams, J. Winn, and A. Zisserman. The pascal visual object classes challenge – a retrospective. *IJCV*, 2014.
- [4] B. Hariharan, P. Arbeláez, L. Bourdev, S. Maji, and J. Malik. Semantic contours from inverse detectors. In *ICCV*, 2011.
